# Supplementary material
Source: PubMed Central journal article supplement (PMC10066315)
Supplement: 41422_2023_779_MOESM4_ESM.pdf [file 41422_2023_779_MOESM4_ESM.pdf]

## Supplementary information, Fig. S4

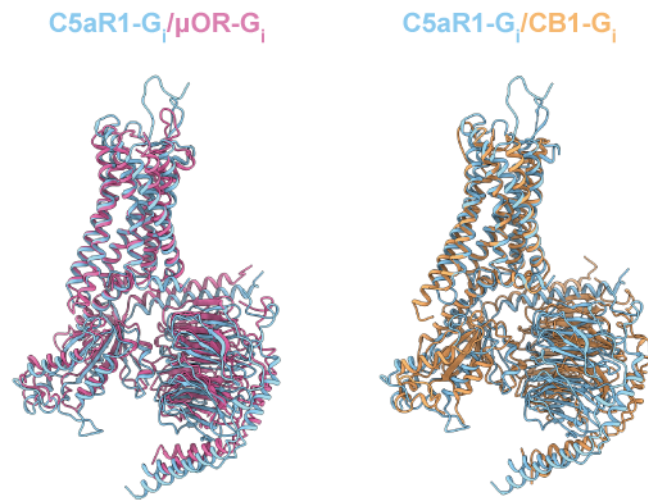

**Fig. S4. Structural alignment of C5aR1-G<sub>i</sub> complex with μOR-G<sub>i</sub> complex and CB1-G<sub>i</sub> complex.** The superimposition was based on the receptor. Light sky blue, C5aR1-G<sub>i</sub> complex; hot pink, μOR-G<sub>i</sub> complex (PDB:6DDE); orange, CB1-G<sub>i</sub> complex (PDB: 6N4B).
