# Supplementary material
Source: PubMed Central journal article supplement (PMC10066315)
Supplement: 41422_2023_779_MOESM5_ESM.pdf [file 41422_2023_779_MOESM5_ESM.pdf]

# Supplementary information, Fig. S5

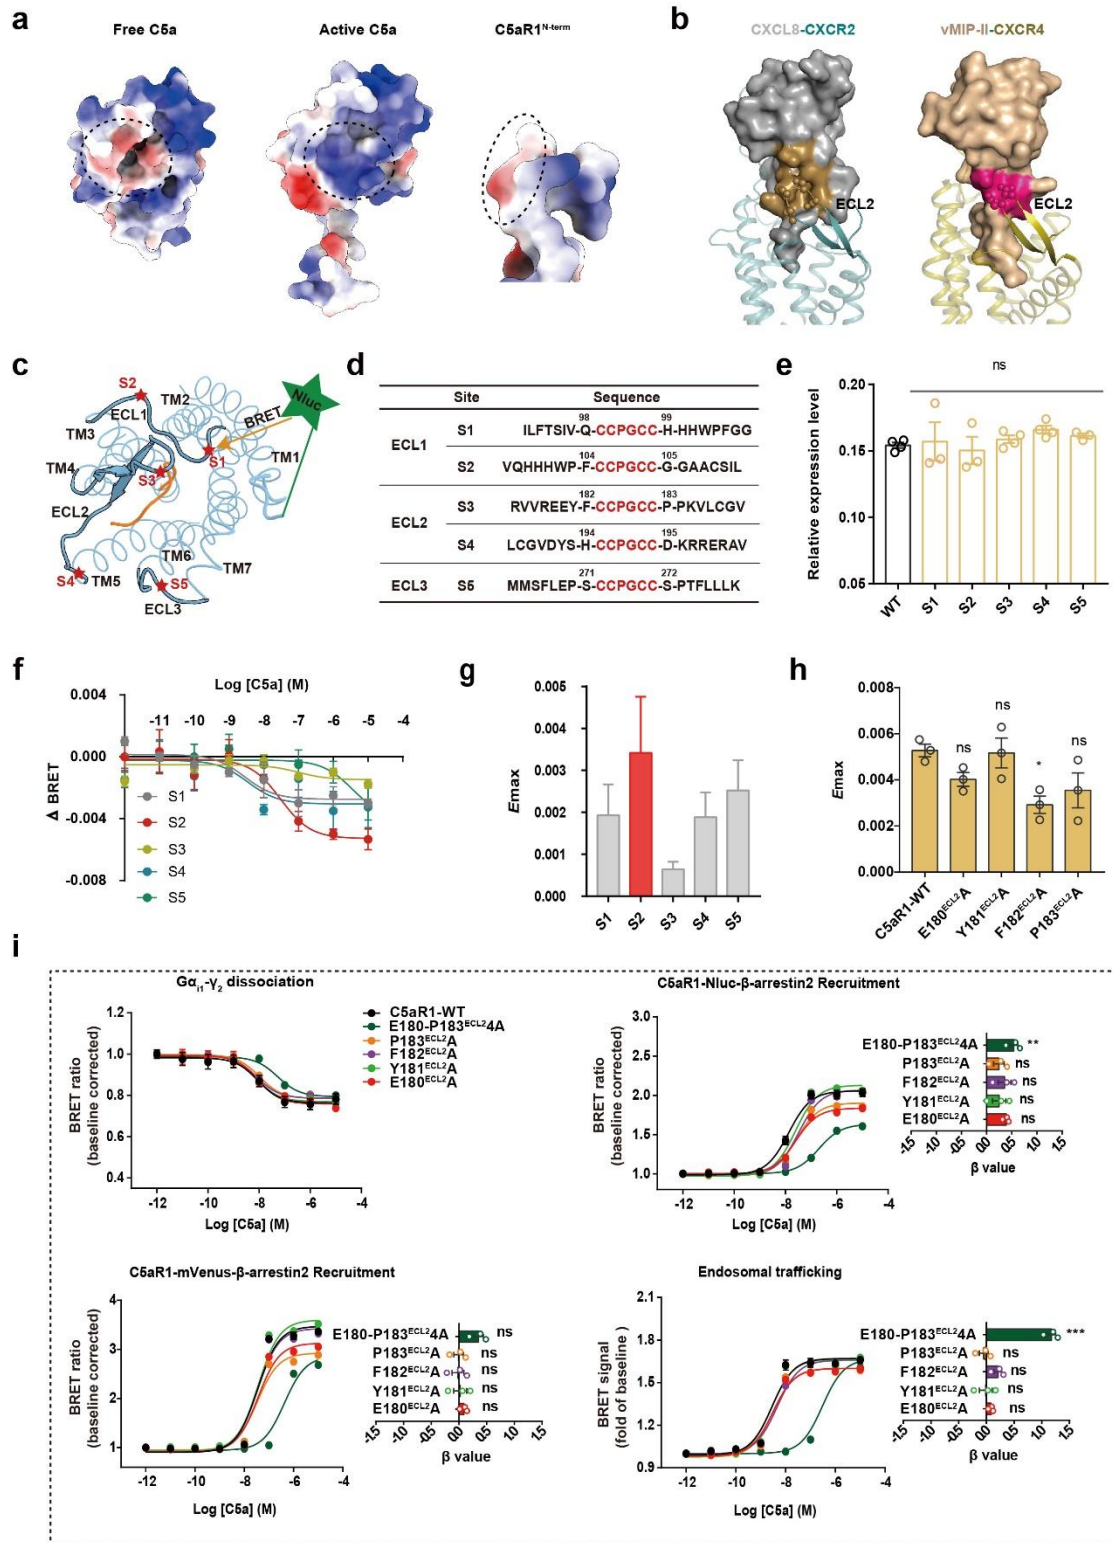

Fig. S5. Site 1 and Site 3 of C5a-C5aR1.

**a**, The electrical charge distribution of free state C5a (left panel), active state C5a (middle panel) and N-terminus of C5a-bound C5aR1 (right panel). The region of C5a interact with the N-terminus of C5aR1 were highlighted with black-dashed circles.

**b**, Both of ECL2 in CXCR2 (PDB: 6LFM) and CXCR4 (PDB:4RWS) involved in the ligand recognition, forming a binding site equivalent to the site 3 in C5a-bound C5aR1.

**c**, FAsH-BRET assay design of C5aR1. The Nluc was fused to the N-terminus of C5aR1, and the FAsH motif were inserted in 5 different extracellular loop regions. The designated positions were indicated as red stars.

**d**, The detail FAsH motif incorporation sites in C5aR1. The FAsH motifs are highlighted in red colors.

**e**, The expression levels of wild-type (WT) C5aR1 and five FAsH motif incorporated FAsH-BRET sensors detected by ELISA experiments. Data represent the mean  $\pm$  SEM from three independent experiments performed in triplicate. ns, no significant difference.

**f**, The representative curve for C5a-induced BRET ratio in response to five C5aR1 FAsH-BRET sensors. Values are mean  $\pm$  SEM from three independent experiments performed in triplicate.

**g**, The efficacy changes for C5a-induced BRET ratio in response to five C5aR1 FAsH-BRET sensors. Values are mean  $\pm$  SEM from three independent experiments performed in triplicate.

**h**, The calculated efficacy ( $E_{max}$ ) changes upon C5a activation by different FAsH-BRET S2 mutants.

**i**, The mutagenesis effects of residues in site 3 of C5aR1 on C5a induced different signaling pathways. The  $G_i$  protein signaling was examined by  $G_i$  protein dissociation assay,  $\beta$ -arrestin2 recruitment was detected by BRET assay including C5aR1 labeled with Nluc and mVenus and C5a-dependent endosomal trafficking of C5aR1 was measured by bBRET with FYVE-mVenus. The bias factors derived from curve fit parameters and show in the right side respectively.  $P$  values were determined by one-way ANOVA. The asterisk symbols indicate statistically significant difference (\*\* $P < 0.01$ , \*\*\* $P < 0.001$ , ns: no significance). Data shown are mean  $\pm$  SEM of a representative experiment performed in triplicate.
