# Supplementary material
Source: PubMed Central journal article supplement (PMC10066315)
Supplement: 41422_2023_779_MOESM6_ESM.pdf [file 41422_2023_779_MOESM6_ESM.pdf]

Supplementary information, Fig. S6

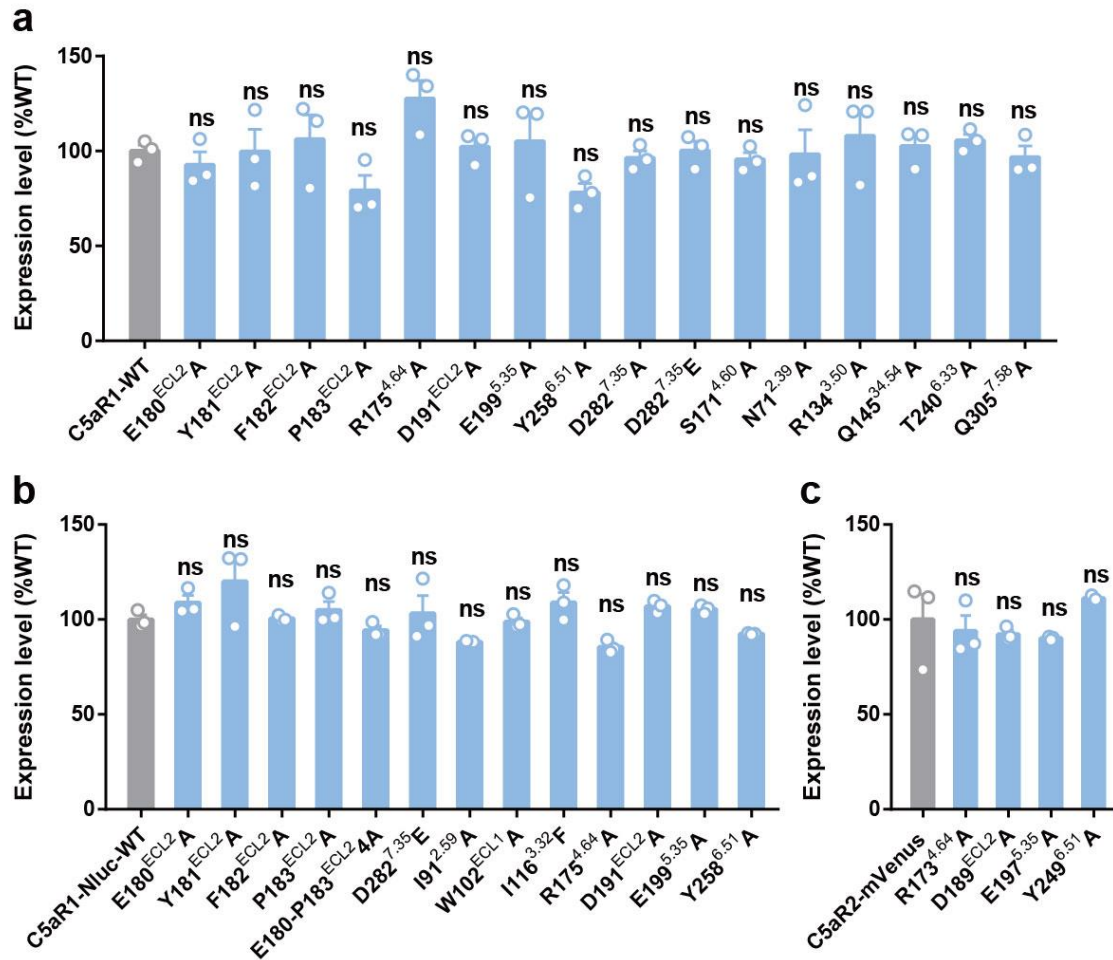

**Fig. S6.** The expression level of wild-type (WT) and mutants of C5aR1 and C5aR2. The cell surface expression level of the C5aR1 (a), C5aR1-Nluc (b), and C5aR2-mVenus (c) WT and mutants were detected by ELISA assay. Data represent the mean  $\pm$  SEM from three independent experiments performed in triplicate. ns, no significant difference.
