# Supplementary material
Source: PubMed Central journal article supplement (PMC10066315)
Supplement: 41422_2023_779_MOESM7_ESM.pdf [file 41422_2023_779_MOESM7_ESM.pdf]

## Supplementary information, Fig. S7

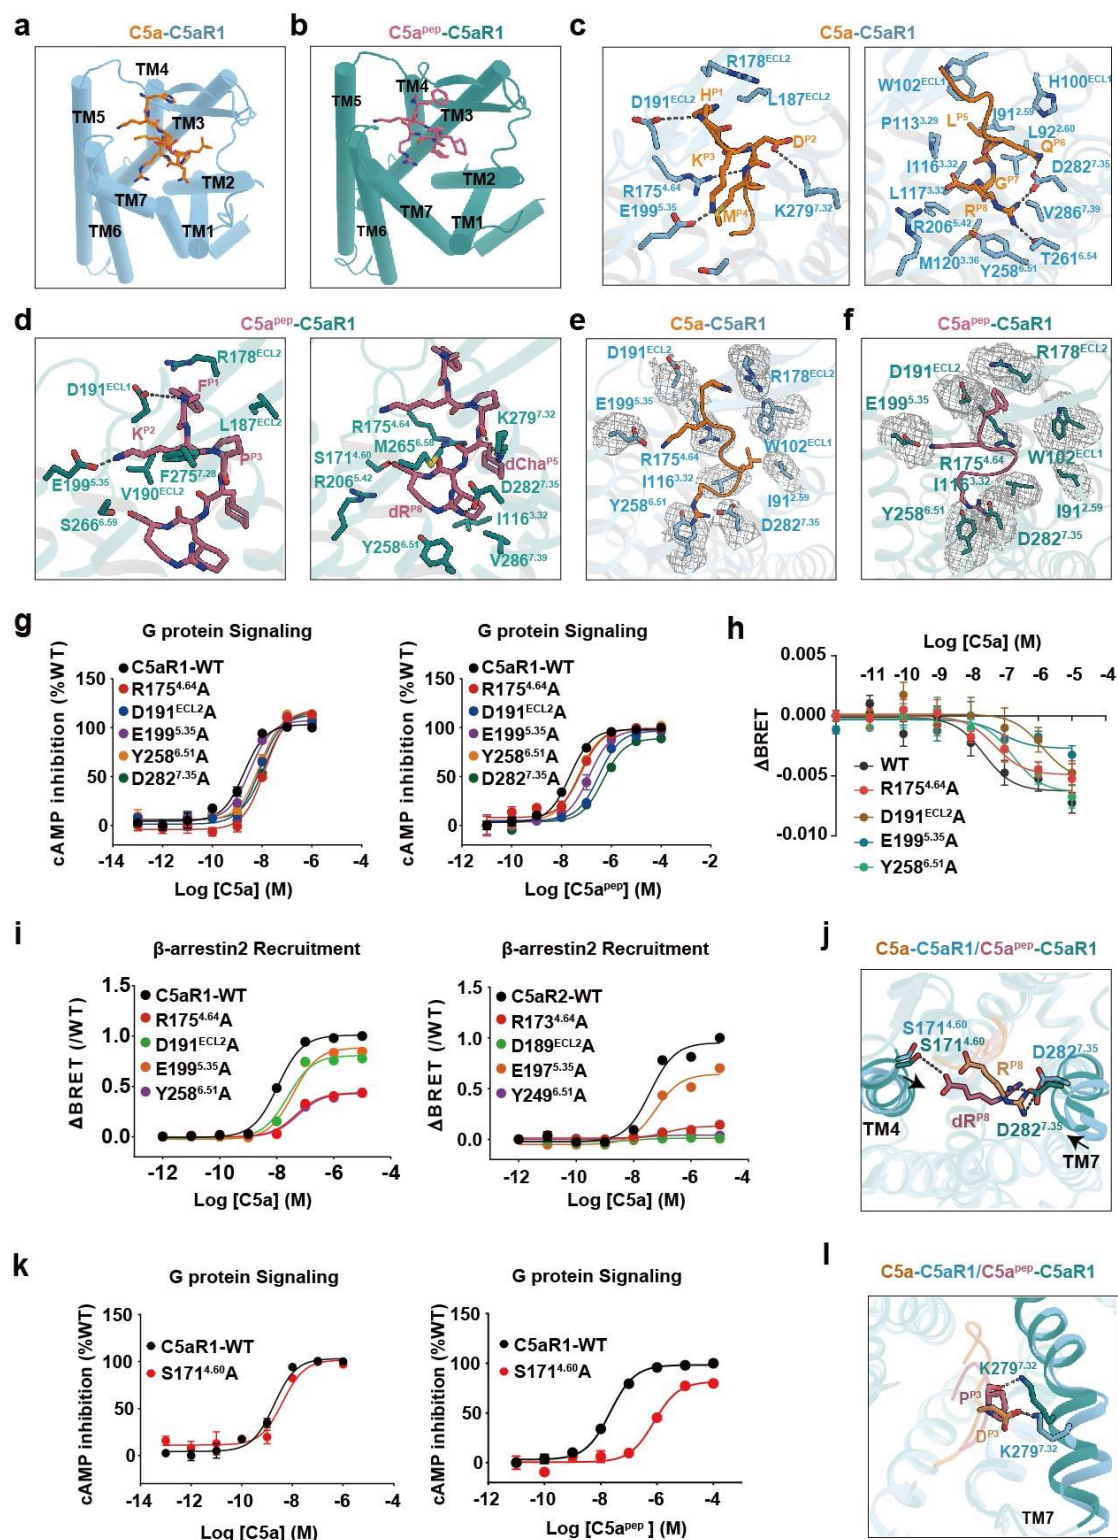

**Fig. S7. Molecular details between C5aR1 and C5a or C5a<sup>pep</sup>.**

**a-b**, The C-terminus of C5a (**a**) and C5a<sup>pep</sup> (**b**) penetrate deeply into the TM helical bundle of C5aR1 in a similar binding pose. The C-terminus of C5a and C5a<sup>pep</sup> are shown as sticks, C5aR1 is shown as cartoon with cylindrical helices.

**c-d**, Detailed interaction of C5aR1 with C5a (**c**) or C5a<sup>pep</sup> (**d**). The interactions between P1-P4 of C5a or C5a<sup>pep</sup> and C5aR1 are shown in the left panel, that between P5-P8 of C5a or C5a<sup>pep</sup> and C5aR1 are shown in the right panel. Polar interactions are highlighted as black dashed lines.

**e-f**, High-quality electron density facilitated unambiguous assignment of key residues in the binding pocket of C5a-bound (**e**) and C5a<sup>pep</sup>-bound (**f**) C5aR1.

**g**, Representative curve for effects of the R175<sup>4.64</sup>A, D191<sup>ECL2</sup>A, E199<sup>5.35</sup>A, Y258<sup>6.51</sup>A and D282<sup>7.35</sup>A mutations in C5aR1 on C5a (left panel) and C5a<sup>pep</sup> (right panel) induced G protein signaling examined by cAMP inhibition assay. Data are presented as the mean ± SEM of three independent experiments performed in triplicate.

**h**, The representative dose response curves of the C5a-induced BRET ratio in HEK293 cells overexpressing FIAH-BRET S2 wild type and corresponding mutants. Values are mean ± SEM from three independent experiments performed in triplicate.

**i**, Representative curve for effects of the R175<sup>4.64</sup>A, D191<sup>ECL2</sup>A, E199<sup>5.35</sup>A and Y258<sup>6.51</sup>A mutations in C5aR1 (left panel) and the R173<sup>4.64</sup>A, D189<sup>ECL2</sup>A, E197<sup>5.35</sup>A and Y249<sup>6.51</sup>A C5aR2 (right panel) on C5a induced β-arrestin2 recruitment examined by BRET assay. Data are presented as the mean ± SEM of three independent experiments performed in triplicate.

**j**, Structural alignment of C5a-bound and C5a<sup>pep</sup>-bound C5aR1 showing that dR<sup>P8</sup> in C5a<sup>pep</sup> forms polar interactions with both S171<sup>4.60</sup> in TM4 and D282<sup>7.35</sup> in TM7, leading to inward shift of TM4 and TM7, but the R<sup>P8</sup> in C5a lost the polar interactions with S171<sup>4.60</sup>. Polar interactions are highlighted as black dashed lines.

**k**, The S171<sup>4.60</sup>A mutation greatly impaired C5a<sup>pep</sup>-induced G protein signaling (right panel) but had no effect on the potency and efficacy in response to C5a (left panel), the signaling was monitored by cAMP inhibition assay. Data are mean ± SEM from at least three independent experiments.

**l**, K279<sup>7.32</sup> of C5aR1 forms a salt-bridge with the side chain of D<sup>P3</sup> in C5a, instead a H-bond with the main chain of P<sup>P3</sup> in C5a<sup>pep</sup>. Polar interactions are highlighted as black dashed lines.
