# Supplementary material
Source: PubMed Central journal article supplement (PMC10066315)
Supplement: 41422_2023_779_MOESM8_ESM.pdf [file 41422_2023_779_MOESM8_ESM.pdf]

Supplementary information, Fig. S8

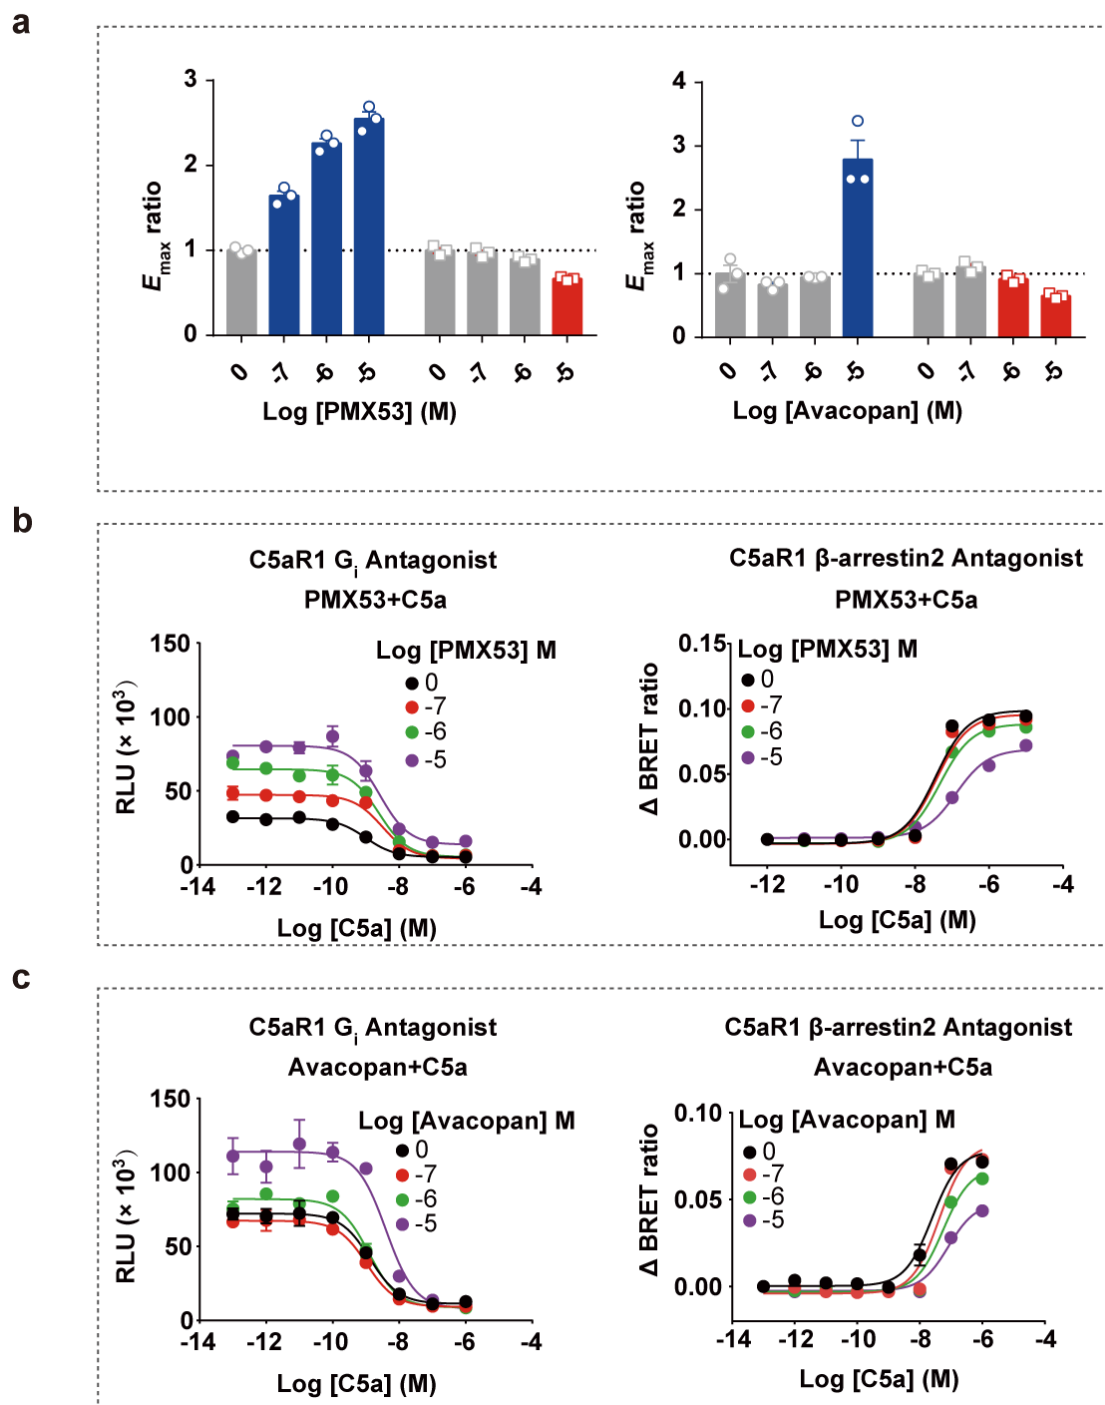

**Fig. S8. Antagonism of PMX53 and Avacopan towards C5aR1.**

**a**, The  $E_{max}$  ratio of PMX53 and Avacopan. Data are presented as the mean  $\pm$  SEM of three independent experiments performed in triplicate.

**b-c**, The antagonistic potency of PMX53 (**b**) and Avacopan (**c**) in competition with C5a measuring  $G_i$ -protein signaling (left panel) and  $\beta$ -arrestin2 recruitment (right

panel). Data are presented as the mean  $\pm$  SEM of three independent experiments performed in triplicate.
