# Supplementary material
Source: PubMed Central journal article supplement (PMC10066315)
Supplement: 41422_2023_779_MOESM9_ESM.pdf [file 41422_2023_779_MOESM9_ESM.pdf]

## Supplementary information, Fig. S9

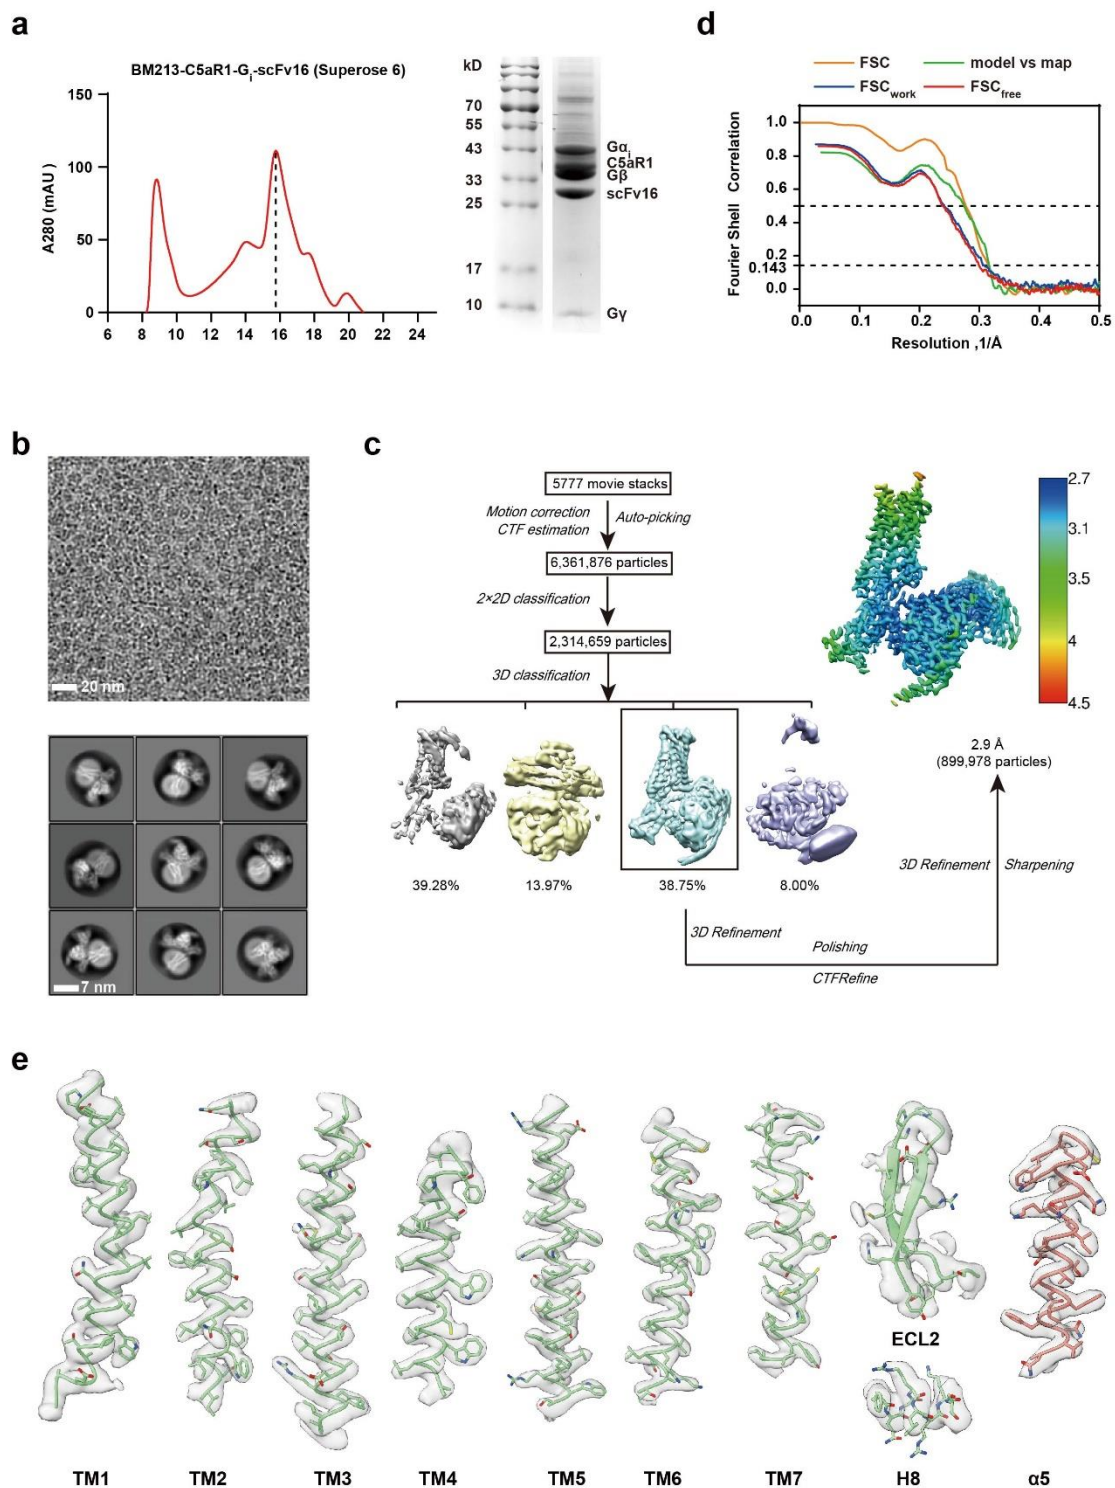

**Fig. S9. Single-particle reconstruction of BM213-C5aR1-G<sub>i</sub> complex.**

**a**, Representative elution profile of the purified BM213-C5aR1-G<sub>i</sub> complex (left panel) and SDS-PAGE of the size-exclusion chromatography peak (right panel).

**b**, Representative cryo-EM micrographs (upper panel) and 2D classification averages (lower panel) of the BM213-C5aR1-G<sub>i</sub> complex.

**c**, Cryo-EM data processing flowcharts and local resolution for the BM213-C5aR1-G<sub>i</sub> complex.

**d**, Gold-standard FSC curve (orange), the model-vs-map curve (green), FSC<sub>work</sub> (blue) and FSC<sub>free</sub> (red) validation curve of C5a<sup>pep</sup>-C5aR1-G<sub>i</sub> complex. The marginal gap between the FSC<sub>work</sub> and FSC<sub>free</sub> validation curve indicate no over-fitting of the model.

**e**, Cryo-EM density maps and models for transmembrane helixes TM1-TM7, ECL2 and H8 of C5aR1, as well as the  $\alpha 5$  helix of G $\alpha_{i1}$ .
