# Supplementary material
Source: PubMed Central journal article supplement (PMC10066315)
Supplement: 41422_2023_779_MOESM10_ESM.pdf [file 41422_2023_779_MOESM10_ESM.pdf]

Supplementary information, Fig. S10

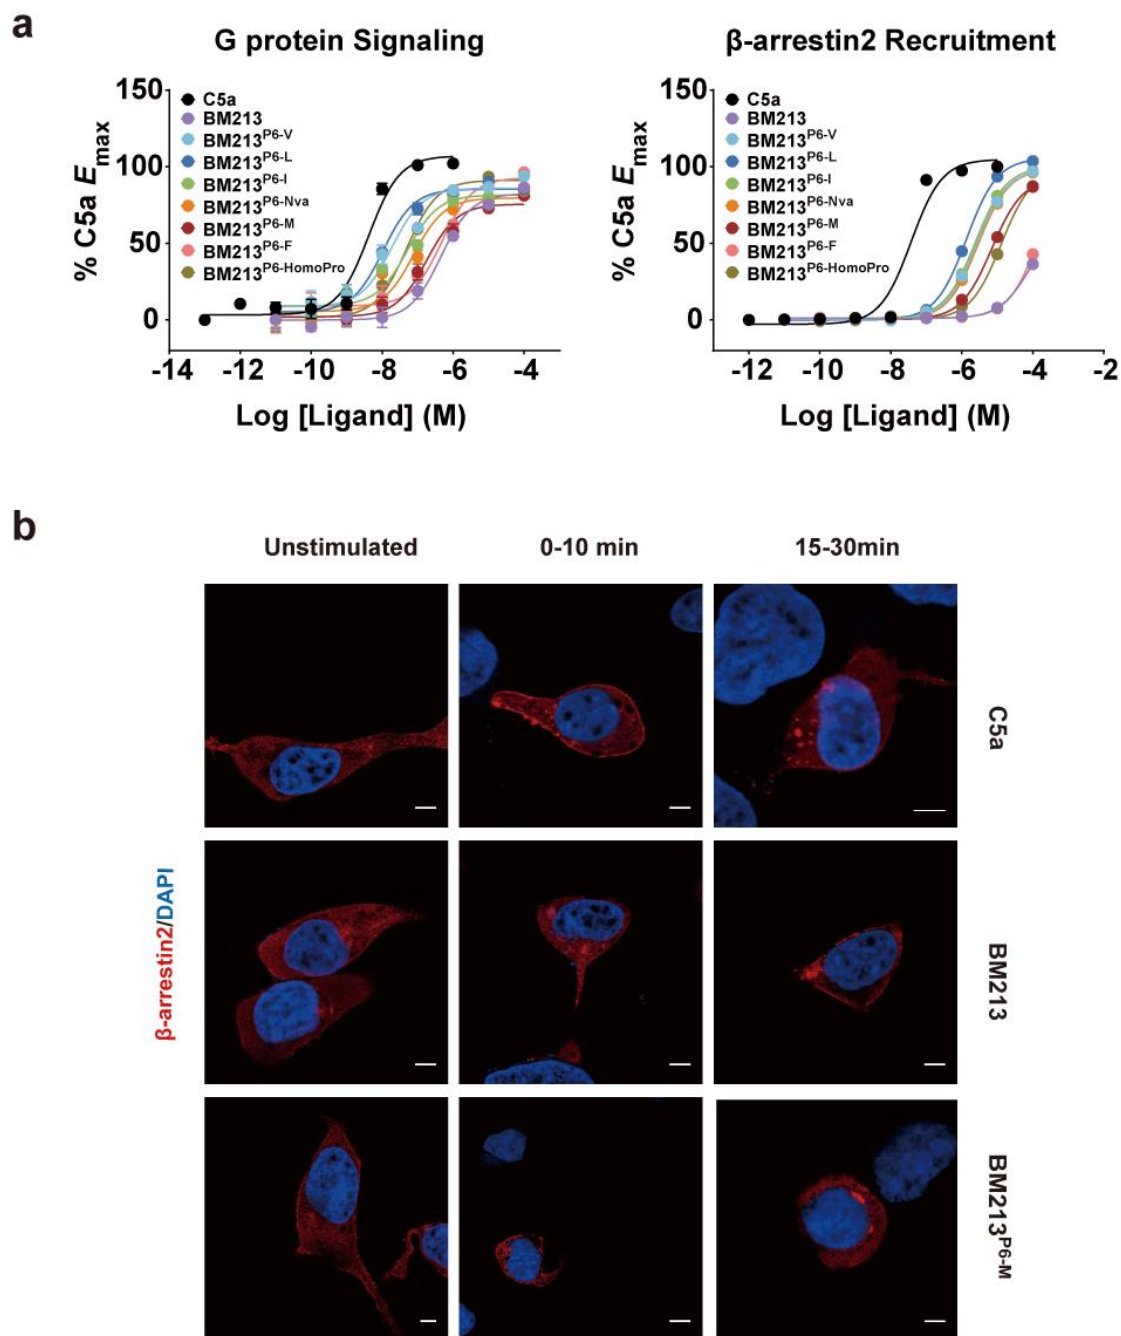

**Fig. S10. Effects of mutations at the P6 position of BM213 on  $G_i$  and  $\beta$ -arrestin signaling of C5aR1.**

**a**, The signaling properties of BM213 derivatives with modification on the P6 position. The  $G_i$  protein signaling was detected by  $G_i$  protein dissociation assay (left panel) and the  $\beta$ -arrestin2 recruitment was examined by BRET assay (right panel). Data are presented as the mean  $\pm$  SEM of three independent experiments performed in triplicate.

**b,** Ligands induced endosomal trafficking of  $\beta$ -arrestin2. HEK293 cells expressing C5aR1-WT and mCherry- $\beta$ -arrestin2 were stimulated with C5a (100 nM), BM213 (100  $\mu$ M) and BM213<sup>P6-M</sup> (100  $\mu$ M), and the trafficking patterns of  $\beta$ -arrestin2 were visualized using confocal microscopy at indicated time points. The scale bar represents 5  $\mu$ m.
