# Supplementary material
Source: PubMed Central journal article supplement (PMC10066315)
Supplement: 41422_2023_779_MOESM12_ESM.pdf [file 41422_2023_779_MOESM12_ESM.pdf]

## Supplementary information, Fig. S12

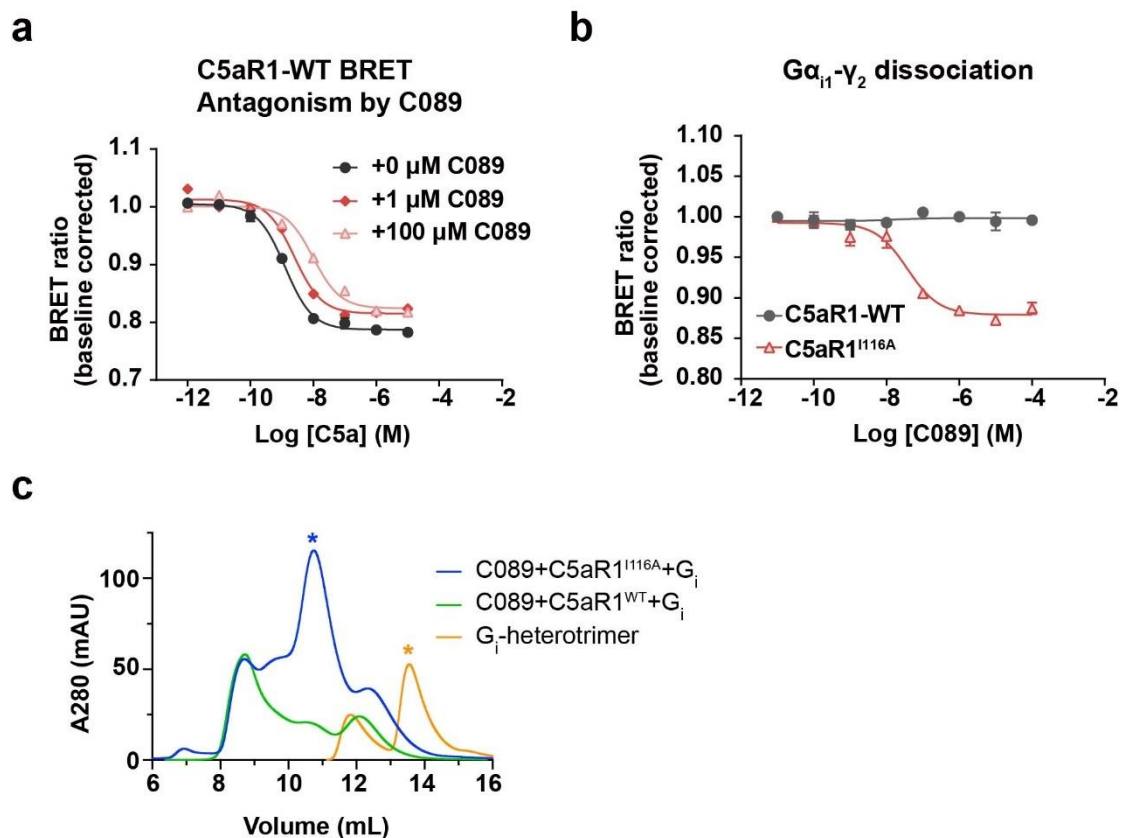

**Fig. S12. C089 acts as antagonist for wild-type C5aR1 but an agonist of the C5aR1<sup>I116A</sup> mutant.**

**a**, BRET data showing C5a-mediated G<sub>i</sub> protein dissociation for C5aR1 were antagonized by C089 in a concentration-dependent manner. Data are presented as the mean  $\pm$  SEM of three independent experiments performed in triplicate.

**b**, The G<sub>i</sub> protein dissociation induced by C089 for C5aR1 and C5aR1<sup>I116A</sup>, Data are presented as the mean  $\pm$  SEM of three independent experiments performed in triplicate.

**c**, Size-exclusion chromatography (SEC) analysis of samples prepared by mixing purified heterotrimeric G<sub>i</sub> with either purified C5aR1<sup>I116A</sup> or C5aR1<sup>WT</sup> in the presence of C089. The peak of C089-C5aR1-G<sub>i</sub> complex is marked with blue asterisk, and the heterotrimeric G<sub>i</sub> peak is marked with orange asterisk.
