# Supplementary material
Source: PubMed Central journal article supplement (PMC10066315)
Supplement: 41422_2023_779_MOESM14_ESM.pdf [file 41422_2023_779_MOESM14_ESM.pdf]

## Supplementary information, Fig. S14

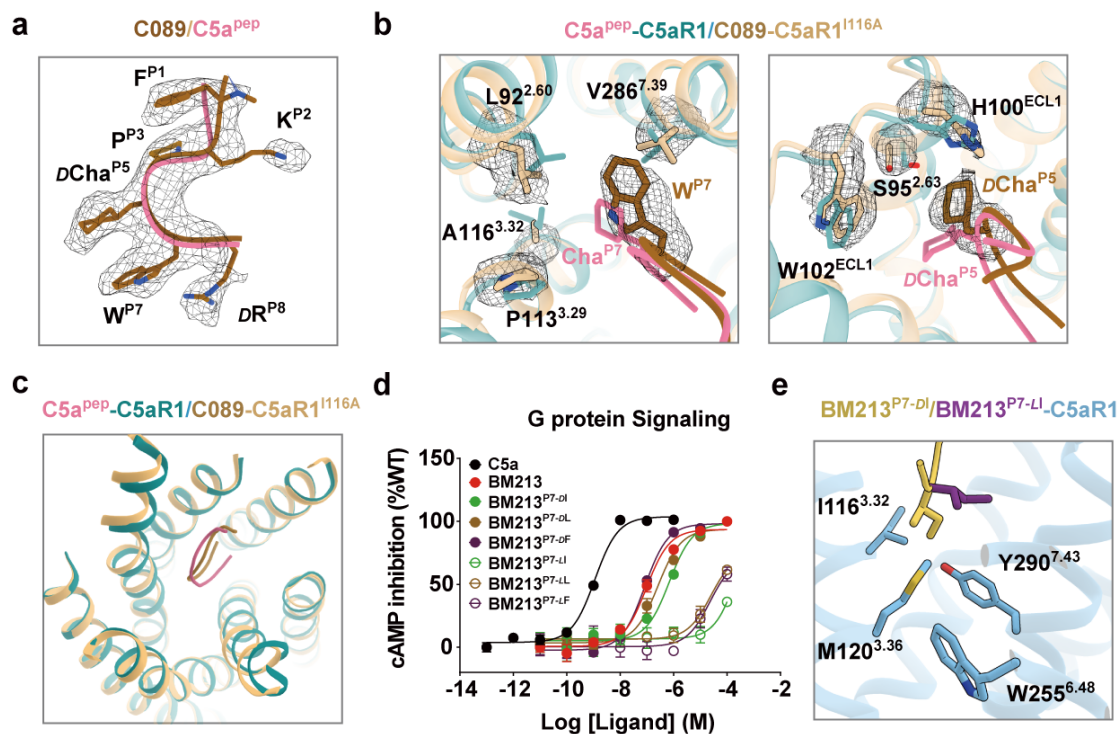

**Fig. S14. The structure of C089-bound C5aR1<sup>I116A</sup>.**

**a**, EM density of C089 in C089-C5aR1<sup>I116A</sup> complex structure.

**b**, EM density of W<sup>P7</sup> (left panel), Cha<sup>P5</sup> (right panel) and their surrounding residues in C089-C5aR1<sup>I116A</sup> complex structure, corresponding residues in C5a<sup>pep</sup>-C5aR1 complex was aligned as a reference.

**c**, Structural superimposition of C5a<sup>pep</sup>-C5aR1 with C089-C5aR1<sup>I116A</sup> showing that the two structures share the similar conformation of TM bundles.

**d**, BM213 derivatives with modification on the P7 position induced G<sub>i</sub> protein signaling detected by cAMP inhibition assay. Data are presented as the mean ± SEM of three independent experiments performed in triplicate.

**e**, Structural comparison of BM213<sup>P7-DI</sup> and BM213<sup>P7-LI</sup> in C5aR1. The model of BM213<sup>P7-DI</sup> and BM213<sup>P7-LI</sup> were generated and mutated from BM213.
