# Supplementary material
Source: PubMed Central journal article supplement (PMC10066315)
Supplement: 41422_2023_779_MOESM16_ESM.pdf [file 41422_2023_779_MOESM16_ESM.pdf]

**Supplementary information, Fig. S16**

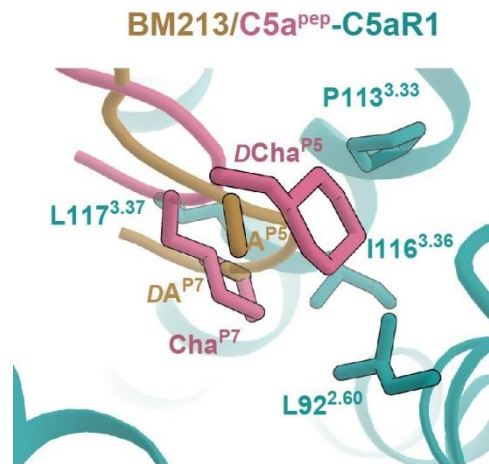

**Fig. S16. Structural comparison of BM213 and C5a<sup>pep</sup> in the orthosteric binding pocket of C5aR1.** *D*Cha<sup>P5</sup> and Cha<sup>P7</sup> of C5a<sup>pep</sup> forms more extensive hydrophobic interactions with C5aR1, when compared to BM213.
