# Supplementary material
Source: PubMed Central journal article supplement (PMC10066315)
Supplement: 41422_2023_779_MOESM17_ESM.pdf [file 41422_2023_779_MOESM17_ESM.pdf]

## Supplementary information, Fig. S17

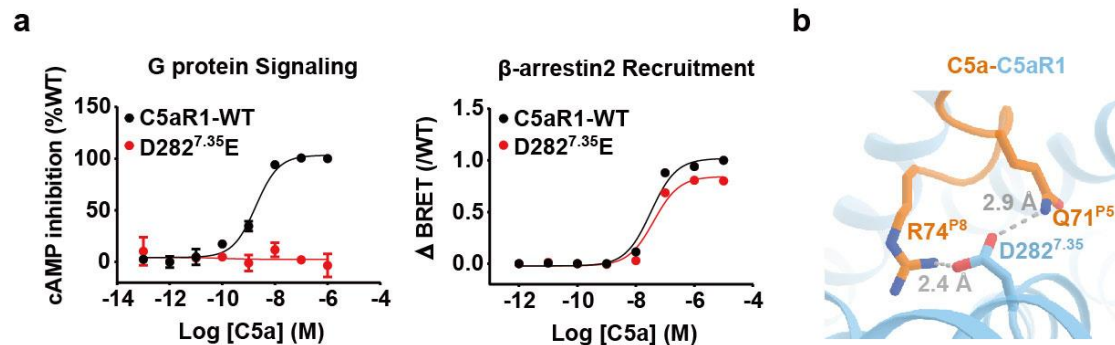

**Fig. S17. Effect of D282<sup>7.35</sup>E on C5aR1 induced downstream signaling in response to C5a.**

**a**, The G protein signaling was monitored by cAMP inhibition assay, the  $\beta$ -arrestin2 recruitment was examined by BRET assay. Data are presented as the mean  $\pm$  SEM of three independent experiments performed in triplicate.

**b**, The interaction between D282<sup>7.35</sup> of C5aR1 and C5a. The polar interactions were highlighted with grey dashed lines and the corresponding distance were labeled in the figure.
