# Supplementary material
Source: PubMed Central journal article supplement (PMC10066315)
Supplement: 41422_2023_779_MOESM18_ESM.pdf [file 41422_2023_779_MOESM18_ESM.pdf]

## Supplementary information, Table S1

### Cryo-EM data collection, refinement and validation statistics of C5aR1-G<sub>i</sub> complexes.

| Parameters                                          | C5a-C5aR1-G <sub>i</sub><br>complex | C5a <sup>pep</sup> -C5aR1-G <sub>i</sub><br>complex | BM213-C5aR1-G <sub>i</sub><br>complex | C089-C5aR1 <sup>III6A</sup> -<br>G <sub>i</sub> complex |
|-----------------------------------------------------|-------------------------------------|-----------------------------------------------------|---------------------------------------|---------------------------------------------------------|
| <b>Data collection and processing</b>               |                                     |                                                     |                                       |                                                         |
| Magnification                                       | 165,000                             | 165,000                                             | 165,000                               | 165,000                                                 |
| Voltage (kV)                                        | 300                                 | 300                                                 | 300                                   | 300                                                     |
| Electron exposure (e <sup>-</sup> /Å <sup>2</sup> ) | 66                                  | 62                                                  | 67                                    | 63                                                      |
| Defocus range (μm)                                  | -1 to -1.8                          | -1 to -1.8                                          | -1 to -1.8                            | -1 to -1.8                                              |
| Pixel size (Å)                                      | 0.85                                | 0.85                                                | 0.85                                  | 0.85                                                    |
| Symmetry imposed                                    | C1                                  | C1                                                  | C1                                    | C1                                                      |
| Initial particle images (no.)                       | 4,588,123                           | 4,329,443                                           | 6,361,876                             | 2,955,107                                               |
| Final particle images (no.)                         | 623,262                             | 191,664                                             | 899,978                               | 298,883                                                 |
| Map resolution (Å)                                  | 2.9                                 | 3.2                                                 | 2.9                                   | 2.8                                                     |
| FSC threshold                                       | 0.143                               | 0.143                                               | 0.143                                 | 0.143                                                   |
| Map resolution range (Å)                            | 2.8-5.0                             | 2.7-6.5                                             | 2.7-4.5                               | 2.6-4.5                                                 |
| <b>Refinement</b>                                   |                                     |                                                     |                                       |                                                         |
| Initial model used (PDB code)                       | 5O9H,7EW3                           | C5a-C5aR1-G <sub>i</sub>                            | C5a-C5aR1-G <sub>i</sub>              | C5a-C5aR1-G <sub>i</sub>                                |
| Model resolution (Å)                                | 3.2                                 | 3.6                                                 | 3.1                                   | 3.4                                                     |
| FSC threshold                                       | 0.5                                 | 0.5                                                 | 0.5                                   | 0.5                                                     |
| <b>Model composition</b>                            |                                     |                                                     |                                       |                                                         |
| Non-hydrogen atoms                                  | 9520                                | 8726                                                | 8917                                  | 8889                                                    |
| Protein residues                                    | 1218                                | 1109                                                | 1139                                  | 1134                                                    |
| Ligands                                             | 0                                   | 3 (ZAL:1/DAR:2)                                     | 2 (DAL: 1/ACE:1)                      | 2 (ZAL:1/DAR:1)                                         |
| <b>B factors (Å)</b>                                |                                     |                                                     |                                       |                                                         |
| Protein                                             | 58.18                               | 51.57                                               | 52.84                                 | 53.18                                                   |
| Ligand                                              | --                                  | 90.06                                               | 73.72                                 | 74.76                                                   |
| <b>R.m.s. deviations</b>                            |                                     |                                                     |                                       |                                                         |
| Bond lengths (Å)                                    | 0.002                               | 0.002                                               | 0.002                                 | 0.004                                                   |
| Bond angles (°)                                     | 0.560                               | 0.544                                               | 0.571                                 | 1.035                                                   |
| <b>Validation</b>                                   |                                     |                                                     |                                       |                                                         |
| MolProbity score                                    | 1.36                                | 1.61                                                | 1.43                                  | 1.49                                                    |
| Clash score                                         | 4.89                                | 7.93                                                | 6.46                                  | 6.99                                                    |
| Poor rotamers (%)                                   | 0                                   | 0.11                                                | 0                                     | 0.31                                                    |
| <b>Ramachandran plot</b>                            |                                     |                                                     |                                       |                                                         |
| Favored (%)                                         | 97.50                               | 96.96                                               | 97.68                                 | 97.49                                                   |
| Allowed (%)                                         | 2.50                                | 3.04                                                | 2.32                                  | 2.51                                                    |
| Disallowed (%)                                      | 0                                   | 0                                                   | 0                                     | 0                                                       |
