# Supplementary material
Source: PubMed Central journal article supplement (PMC10066315)
Supplement: 41422_2023_779_MOESM19_ESM.pdf [file 41422_2023_779_MOESM19_ESM.pdf]

## Supplementary information, Table S2

Summary of C5a and C5a<sup>pep</sup>-induced cAMP inhibition assay of C5aR1. Related to the Methods section “C5aR1-G<sub>i</sub>-mediated cAMP inhibition assay”.

| Mutation                     | EC <sub>50</sub> (nM) | Fold | E <sub>max</sub> (%WT) | n | EC <sub>50</sub> (nM) | Fold                     | E <sub>max</sub> (%WT) | n | Expression level (%WT) |
|------------------------------|-----------------------|------|------------------------|---|-----------------------|--------------------------|------------------------|---|------------------------|
|                              | <b>C5a</b>            |      |                        |   |                       | <b>C5a<sup>pep</sup></b> |                        |   |                        |
| <b>C5aR1-WT</b>              | 1.87±0.43             | 1.00 | 100                    | 6 | 21.61±2.46            | 1.00                     | 100                    | 6 | 100                    |
| <b>E180<sup>ECL2</sup>A</b>  | 1.17±0.23             | 0.63 | 108.20±4.06            | 3 | -                     | -                        | -                      | 3 | 92.67±9.72             |
| <b>Y181<sup>ECL2</sup>A</b>  | 1.23±0.24             | 0.66 | 93.76±3.66             | 3 | -                     | -                        | -                      | 3 | 99.66±16.60            |
| <b>F182<sup>ECL2</sup>A</b>  | 2.29±0.48             | 1.23 | 103.00±4.46            | 3 | -                     | -                        | -                      | 3 | 106.13±18.32           |
| <b>P183<sup>ECL2</sup>A</b>  | 1.76±0.44             | 0.94 | 97.83±4.61             | 3 | -                     | -                        | -                      | 3 | 79.13±11.46            |
| <b>R175<sup>4.64</sup>A</b>  | 13.05±2.21            | 6.98 | 122.80±4.45            | 3 | 59.95±13.78           | 2.77                     | 91.30±3.88             | 3 | 127.60±13.64           |
| <b>D191<sup>ECL2</sup>A</b>  | 8.14±1.47             | 4.36 | 112.00±4.53            | 3 | 316.30±57.61          | 14.64                    | 91.91±2.96             | 3 | 102.13±6.85            |
| <b>E199<sup>5.35</sup>A</b>  | 3.24±0.71             | 1.73 | 102.20±4.36            | 3 | 129.30±33.29          | 5.98                     | 94.10±4.53             | 3 | 105.11±21.02           |
| <b>Y258<sup>6.51</sup>A</b>  | 7.86±1.53             | 4.20 | 110.80±4.81            | 3 | 49.84±7.96            | 2.31                     | 94.56±2.64             | 3 | 78.11±6.89             |
| <b>D282<sup>7.35</sup>A</b>  | 12.92±2.54            | 6.91 | 110.20±5.01            | 3 | 463.90±89.22          | 21.47                    | 85.40±3.01             | 3 | 96.34±5.27             |
| <b>S171<sup>4.60</sup>A</b>  | 4.03±1.33             | 2.16 | 90.60±5.41             | 3 | 786.40±203.00         | 36.39                    | 81.09±4.14             | 3 | 95.57±5.19             |
| <b>D282<sup>7.35</sup>E</b>  | ND                    | ND   | ND                     | 3 | -                     | -                        | -                      | 3 | 100.17±7.12            |
| <b>N71<sup>2.39</sup>A</b>   | -                     | -    | -                      | - | 31.50±6.27            | 1.46                     | 75.46±2.55             | 3 | 98.13±18.47            |
| <b>R134<sup>3.50</sup>A</b>  | -                     | -    | -                      | - | 148.60±26.93          | 6.88                     | 81.97±2.72             | 3 | 107.92±18.31           |
| <b>Q145<sup>34.54</sup>A</b> | -                     | -    | -                      | - | 45.08±5.91            | 2.09                     | 94.61±2.14             | 3 | 102.56±8.56            |
| <b>T240<sup>6.33</sup>A</b>  | -                     | -    | -                      | - | 33.47±6.80            | 1.55                     | 88.12±3.04             | 3 | 105.54±4.70            |
| <b>Q305<sup>7.58</sup>A</b>  | -                     | -    | -                      | - | 72.97±11.89           | 3.38                     | 89.34±2.69             | 3 | 96.68 ±8.44            |

ND means no detectable due to the low signal. “-” means no measurement.
