# Supplementary material
Source: PubMed Central journal article supplement (PMC10066315)
Supplement: 41422_2023_779_MOESM20_ESM.pdf [file 41422_2023_779_MOESM20_ESM.pdf]

## Supplementary information Table S3

Summary of C5a-mediated  $\beta$ -arrestin2 recruitment assay of C5aRs. Related to the Methods section “BRET assay measuring  $\beta$ -arrestin2 recruitment to C5a receptors”.

| Receptors                          | EC <sub>50</sub> (nM) | Fold       | E <sub>max</sub> (%WT) | n | Expression level (%WT) |
|------------------------------------|-----------------------|------------|------------------------|---|------------------------|
| <b>C5aRs</b>                       |                       | <b>C5a</b> |                        |   |                        |
| <b>C5aR1-WT</b>                    | 14.82±2.76            | 1.00       | 99.72±3.52             | 6 | 100                    |
| <b>E180<sup>ECL2</sup>A</b>        | 18.38±2.73            | 1.24       | 82.74±2.22             | 3 | 108.78±5.51            |
| <b>Y181<sup>ECL2</sup>A</b>        | 14.20±2.50            | 0.96       | 117.50±3.80            | 3 | 120.10±16.84           |
| <b>F182<sup>ECL2</sup>A</b>        | 31.99±8.06            | 2.16       | 102.20±4.20            | 3 | 100.51±1.33            |
| <b>P183<sup>ECL2</sup>A</b>        | 16.72±3.80            | 1.13       | 75.65±3.12             | 3 | 104.90±6.46            |
| <b>E180- P183<sup>ECL2</sup>4A</b> | 198.60±1.63           | 13.42      | 62.94±1.05             | 3 | 94.36±2.19             |
| <b>D282<sup>7.35E</sup></b>        | 40.78±10.59           | 2.75       | 86.59±4.06             | 3 | 103.21±13.22           |
| <b>I91<sup>2.59A</sup></b>         | 23.77±4.36            | 1.60       | 79.54±2.58             | 3 | 88.18±0.41             |
| <b>W102<sup>ECL1</sup>A</b>        | 51.51±18.30           | 3.48       | 24.10±1.59             | 3 | 98.82±2.05             |
| <b>R175<sup>4.64A</sup></b>        | 47.84±9.15            | 3.23       | 43.97±1.55             | 3 | 85.55±1.94             |
| <b>D191<sup>ECL2</sup>A</b>        | 24.48±5.26            | 1.65       | 82.18±3.13             | 3 | 106.90±1.84            |
| <b>E199<sup>5.35A</sup></b>        | 38.26±7.94            | 2.58       | 90.92±3.38             | 3 | 105.50±1.84            |
| <b>Y258<sup>6.51A</sup></b>        | 55.05±8.07            | 3.72       | 43.58±1.20             | 3 | 92.45±0.20             |
| <b>C5aR2-WT</b>                    | 26.53±5.66            | 1.00       | 100                    | 6 | 100                    |
| <b>R173<sup>4.64A</sup></b>        | 16.18±16.74           | 0.61       | 22.78±4.29             | 3 | 93.00±11.43            |
| <b>D189<sup>ECL2</sup>A</b>        | ND                    | ND         | ND                     | 3 | 92.19±2.93             |
| <b>E197<sup>5.35A</sup></b>        | 19.54±7.79            | 0.74       | 85.58±6.32             | 3 | 90.16±0.72             |
| <b>Y249<sup>6.51A</sup></b>        | ND                    | ND         | ND                     | 3 | 111.16±1.05            |

ND means no detectable due to the low signal.
