# Supplementary material
Source: PubMed Central journal article supplement (PMC10066315)
Supplement: 41422_2023_779_MOESM21_ESM.pdf [file 41422_2023_779_MOESM21_ESM.pdf]

## Supplementary information, Table S4

Summary of C5a<sup>pep</sup> and BM213-mediated  $\beta$ -arrestin2 recruitment assay of C5aR1.

| Mutation                    | EC <sub>50</sub> ( $\mu$ M) | Fold | <i>E</i> <sub>max</sub> (%WT) | n | EC <sub>50</sub> ( $\mu$ M) | Fold         | <i>E</i> <sub>max</sub> (%WT) | n | Expression level (%WT) |
|-----------------------------|-----------------------------|------|-------------------------------|---|-----------------------------|--------------|-------------------------------|---|------------------------|
|                             | <b>C5a<sup>pep</sup></b>    |      |                               |   |                             | <b>BM213</b> |                               |   |                        |
| <b>C5aR1-WT</b>             | 1.99±0.11                   | 1.00 | 100                           | 6 | 59.95±5.68                  | 1.00         | 100                           | 6 | 100                    |
| <b>I91<sup>2.59</sup>A</b>  | ND                          | ND   | ND                            | 3 | -                           | -            | -                             | 3 | 88.18±0.41             |
| <b>W102<sup>ECL1</sup>A</b> | ND                          | ND   | ND                            | 3 | ND                          | ND           | ND                            | 3 | 98.82±2.048            |
| <b>I116<sup>3.32</sup>F</b> | 0.31±0.07                   | 0.16 | 106.40±4.43                   | 3 | 13.33±1.35                  | 0.22         | 136.80±2.85                   | 3 | 108.95±7.45            |

ND means no detectable due to the low signal. “-” means no measurement.
