# Supplementary material
Source: PubMed Central journal article supplement (PMC10066315)
Supplement: 41422_2023_779_MOESM22_ESM.pdf [file 41422_2023_779_MOESM22_ESM.pdf]

## Supplementary information, Table S5

Summary of C5a, BM213 and BM213 derivatives with modification on the P6 position induced G protein signaling and  $\beta$ -arrestin2 recruitment of C5aR1.

| Agonist                           | EC <sub>50</sub> (nM) | E <sub>max</sub><br>(%C5a) | n | EC <sub>50</sub> ( $\mu$ M)    | E <sub>max</sub><br>(%C5a) | n |
|-----------------------------------|-----------------------|----------------------------|---|--------------------------------|----------------------------|---|
|                                   | G protein signaling   |                            |   | $\beta$ -arrestin2 recruitment |                            |   |
| <b>C5a</b>                        | 3.67±0.46             | 100                        | 3 | 0.04±0.01                      | 100                        | 3 |
| <b>BM213</b>                      | 512.60±55.03          | 89.49±1.79                 | 3 | 82.50±13.57                    | 36.41±0.84                 | 3 |
| <b>BM213<sup>P6-V</sup></b>       | 35.53±4.23            | 84.95±1.72                 | 3 | 2.59±0.11                      | 96.92±3.09                 | 3 |
| <b>BM213<sup>P6-L</sup></b>       | 16.72±1.74            | 83.62±1.55                 | 3 | 1.35±0.03                      | 103.60±1.65                | 3 |
| <b>BM213<sup>P6-I</sup></b>       | 52.87±4.06            | 84.79±1.14                 | 3 | 2.39±0.08                      | 97.48±2.16                 | 3 |
| <b>BM213<sup>P6-Nva</sup></b>     | 90.22±10.02           | 89.29±1.83                 | 3 | 2.88±0.11                      | 96.36±2.52                 | 3 |
| <b>BM213<sup>P6-M</sup></b>       | 159.00±15.77          | 93.14±1.68                 | 3 | 6.99±0.38                      | 86.83±2.48                 | 3 |
| <b>BM213<sup>P6-F</sup></b>       | 455.10±34.91          | 103.40±1.45                | 3 | 154.90±59.01                   | 42.86±2.38                 | 3 |
| <b>BM213<sup>P6-HomoPro</sup></b> | 92.37±13.30           | 90.18±2.40                 | 3 | 12.80±0.46                     | 87.39±1.91                 | 3 |
